# Supplementary material for: S-Nitroso-N-acetylpenicillamine grafted silicone oil for antibacterial interface applications
Source: Royal Society of Chemistry journal article supplement (doi:10.1039/d2ma00414c), 2022-01-01
Supplement: d2ma00414c1.pdf [file d2ma00414c1.pdf]

## Supplementary Information

### ***S*-Nitroso-*N*-acetylpenicillamine grafted silicone oil for antibacterial applications**

*Yun Qian, Manjyot Kaur Chug, Hamed Massoumi, Elizabeth J. Brisbois\**

School of Chemical, Materials, and Biomedical Engineering, University of Georgia, Athens,  
Georgia, United States.

\*Corresponding Author:

Dr. Elizabeth J Brisbois

School of Chemical, Materials, and Biomedical Engineering, University of Georgia

220 Riverbend Road, Athens, GA 30602

Telephone: (706) 542-1243

E-mail: [ejbrisbois@uga.edu](mailto:ejbrisbois@uga.edu)



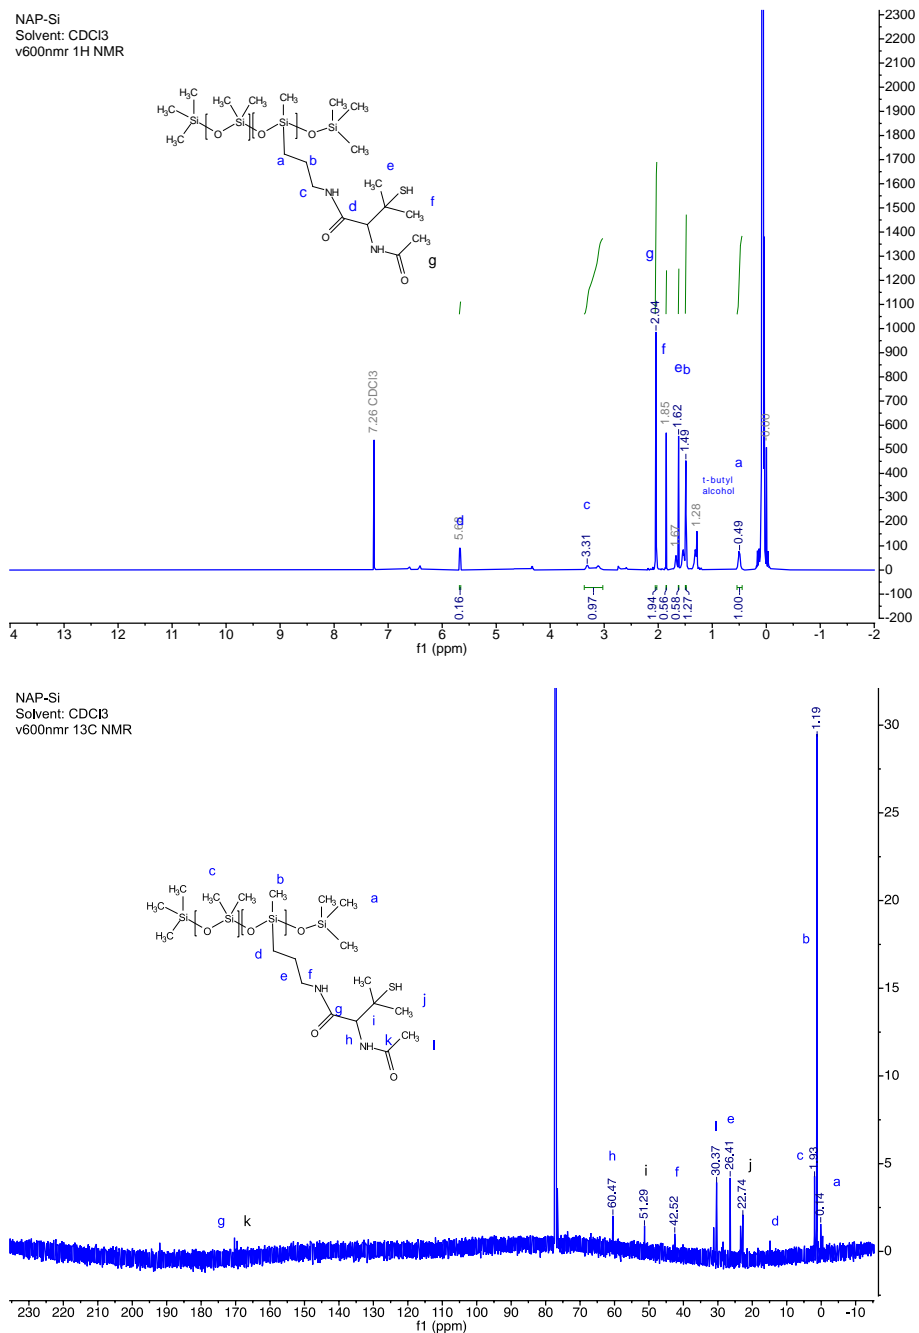

**Figure. S2.** <sup>1</sup>H and <sup>13</sup>C NMR of NAP-Si. <sup>1</sup>H and <sup>13</sup>C NMR was obtained by a Varian/ Agilent VNMRs 600 MHz with a 5 mm HCN cold probe and cooled carbon preamp. Results were reported in ppm relative to the internal solvent resonances of CDCl<sub>3</sub>, with 64 and 216 scans, respectively.

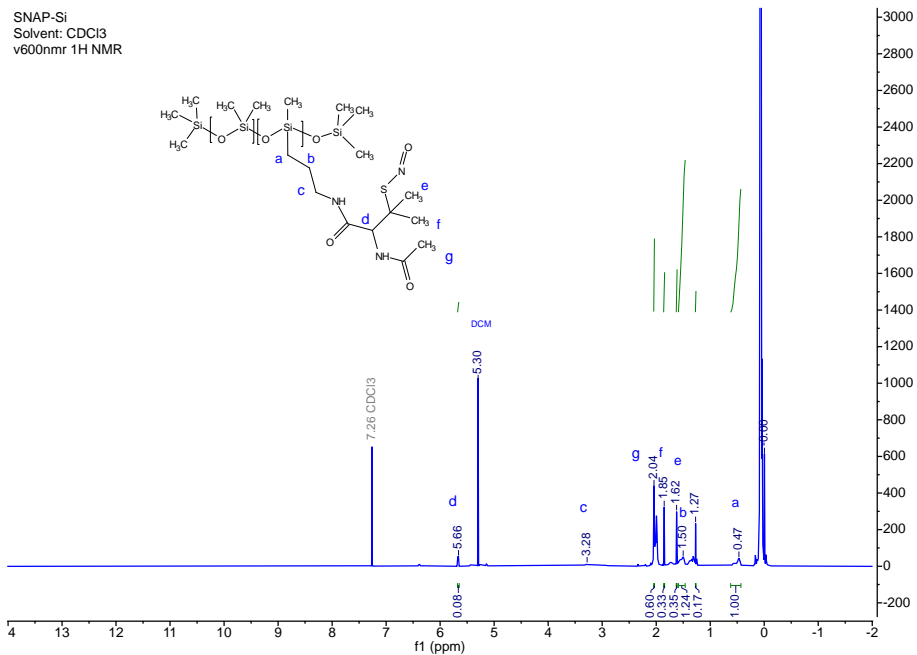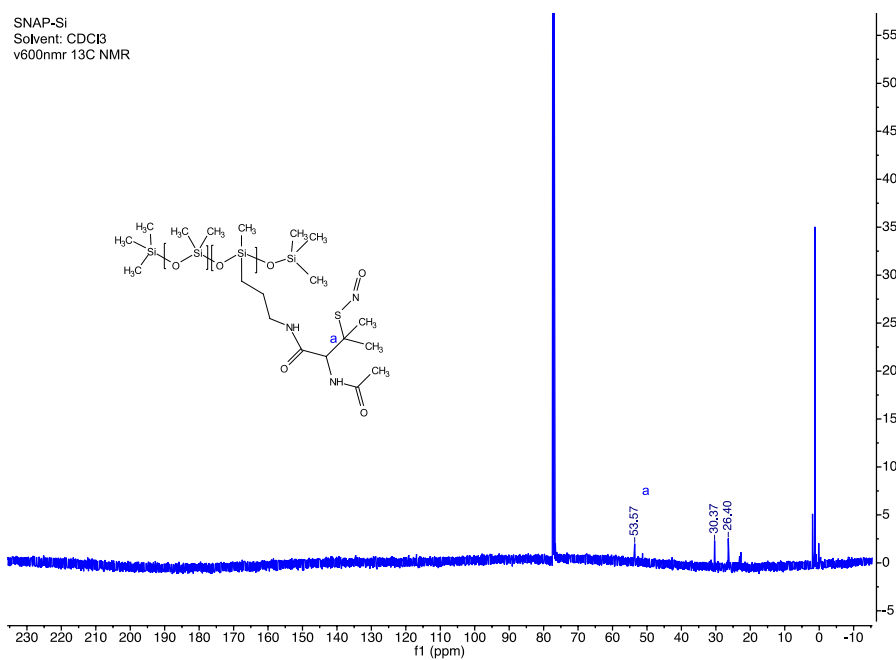

**Figure. S3.** <sup>1</sup>H and <sup>13</sup>C NMR of SNAP-Si. <sup>1</sup>H and <sup>13</sup>C NMR was obtained by a Varian/ Agilent VNMRs 600 MHz with a 5 mm HCN cold probe and cooled carbon preamp. Results were reported in ppm relative to the internal solvent resonances of CDCl<sub>3</sub>, with 64 and 216 scans, respectively.

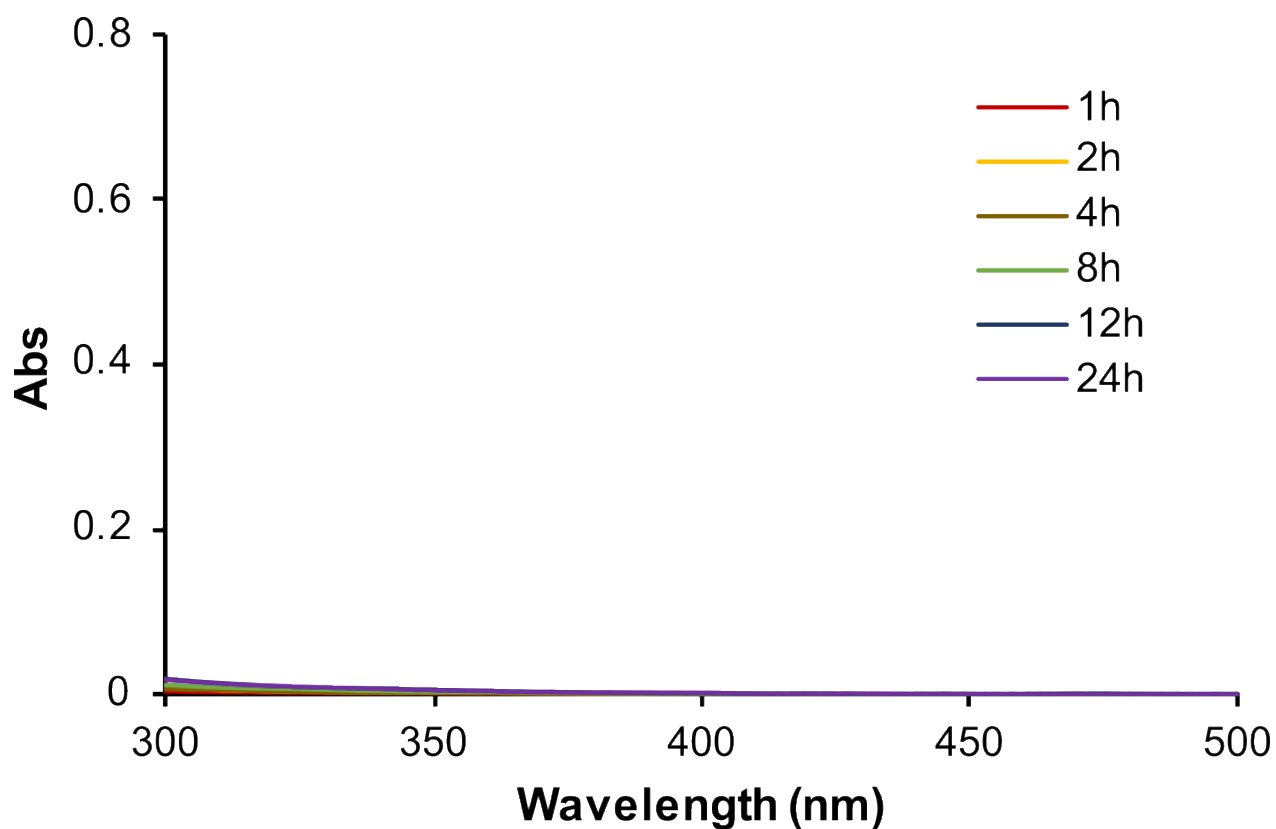

**Figure. S4.** Leaching of SNAP-Si-SR disks. Each SNAP-Si-SR disk was soaked in 1 mL of 10 mM PBS (pH 7.4) containing 100  $\mu$ M EDTA at 37  $^{\circ}$ C in an incubator. Then 1 mL of soaking solution was measured by UV-vis and the absorption was recorded. At the same time, the sample vial was replenished with 1 mL of fresh 10 mM PBS (pH 7.4, 100  $\mu$ M EDTA), and incubated at 37  $^{\circ}$ C until the next reading.
